# Supplementary material
Source: PubMed Central journal article supplement (PMC4224290)
Supplement: NIHMS493758-supplement-01.pdf [file NIHMS493758-supplement-01.pdf]

**DATA SUPPLEMENT**

Search strategy for Ovid MEDLINE(R), Ovid MEDLINE(R) In-Process, CDSR, CCTR

- 1 ((atrial or atrium) adj1 (fibrillat\$ or tachyarrhythmia\$1)).ti,ab.
- 2 atrial fibrillation/
- 3 1 or 2
- 4 electrogram\$.mp. [mp=ti, ot, ab, nm, hw, ui, tx, kw, ct, sh]
- 5 3 and 4
- 6 catheter ablation/ or electrosurgery/ or electrocoagulation/
- 7 ablat\$.ti,ab,hw.
- 8 (pulmonary vein\$ adj1 isolat\$5).ti,ab.
- 9 6 or 7 or 8
- 10 5 and 9

Search strategy for EMBASE

- 1 'heart atrium fibrillation'/exp OR 'heart supraventricular arrhythmia'/exp OR 'paroxysmal supraventricular tachycardia'/exp OR 'supraventricular tachycardia'/exp AND [embase]/lim
- 2 ((atrial OR atrium) NEAR/3 (fibrillat\* OR tachyarrhythmia\*)):ab,ti AND [embase]/lim
- 3 #1 OR #2
- 4 electrogram\* AND [embase]/lim
- 5 #3 AND #4
- 6 'catheter ablation'/exp OR 'electrosurgery'/exp OR 'radiofrequency ablation'/exp AND [embase]/lim
- 7 ablat\*:ab,ti AND [embase]/lim
- 8 pulmonary:ab,ti AND (vein NEAR/1 isolat\*):ab,ti AND [embase]/lim
- 9 #6 OR #7 OR #8
- 10 #5 AND #9
